# Supplementary material
Source: MDPI journal article supplement (https://www.mdpi.com/2227-9717/9/5/783)
Supplement: s1 [file s1 › ▓╣│Σ▓─┴╧---Figure S1.pdf]

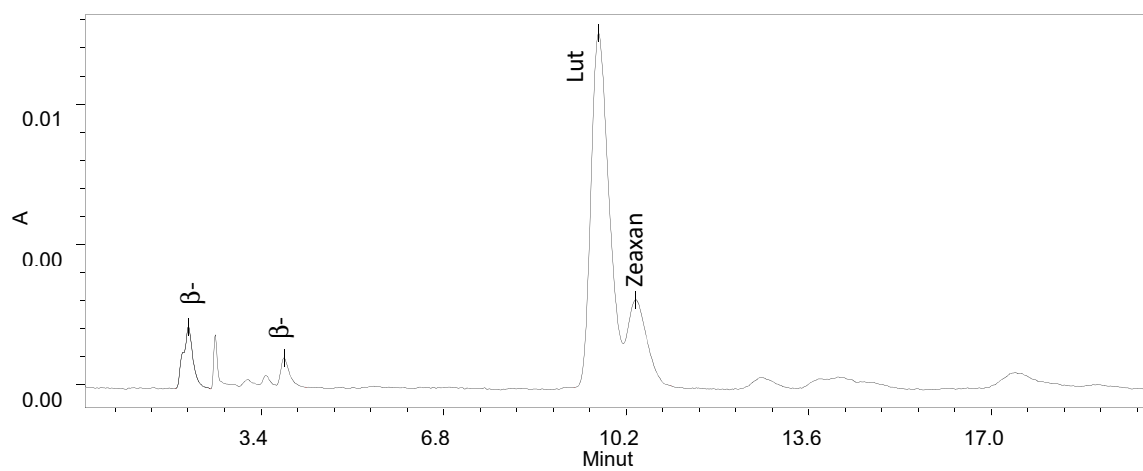

**Figure S1.** Example of a representative HPLC chromatogram (showing Diamant Brun from Alnarp), with the four peaks of the different carotenoids in the samples indicated by their designations.
